# Supplementary material for: A Phase II study to evaluate the safety and efficacy of prasinezumab in early Parkinson’s disease (PASADENA): rationale, design and baseline data
Source: medRxiv preprint, doi:10.1101/2021.04.09.21251911, version 1 (2021-04-15)
Supplement: Supplementary Figure 1 [file 251911_file03.docx]

**Figure 1.** Covariate balance between the treatment-naïve and MAO-B inhibitor subgroups of the PASADENA population (Love plot)


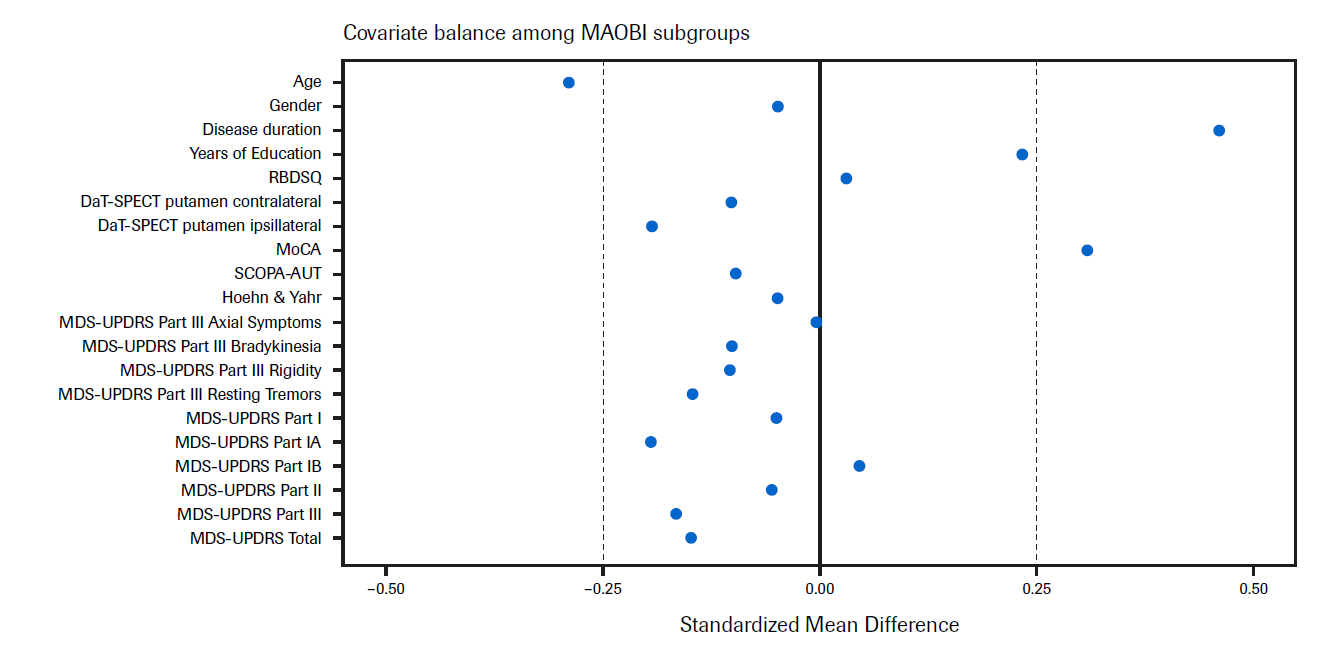


DaT-SPECT, dopamine transporter single-photon emission computerized tomography; MDS-UPDRS, Movement Disorder Society – Unified Parkinson’s Disease Rating Scale; MoCA, Montreal Cognitive Assessment; PPMI, Parkinson’s Progression Marker Initiative; RBDSQ, Rapid Eye Movement Sleep Behavior Disorder Screening Questionnaire; SCOPA-AUT, Scales for outcomes in Parkinson’s disease autonomic dysfunction.
