# Supplementary material for: A Phase II study to evaluate the safety and efficacy of prasinezumab in early Parkinson’s disease (PASADENA): rationale, design and baseline data
Source: medRxiv preprint, doi:10.1101/2021.04.09.21251911, version 1 (2021-04-15)
Supplement: Supplementary Figure 2 [file 251911_file04.docx]

**Figure 2.** Covariate balance between the PASADENA population and the PPMI cohort (Love plot)


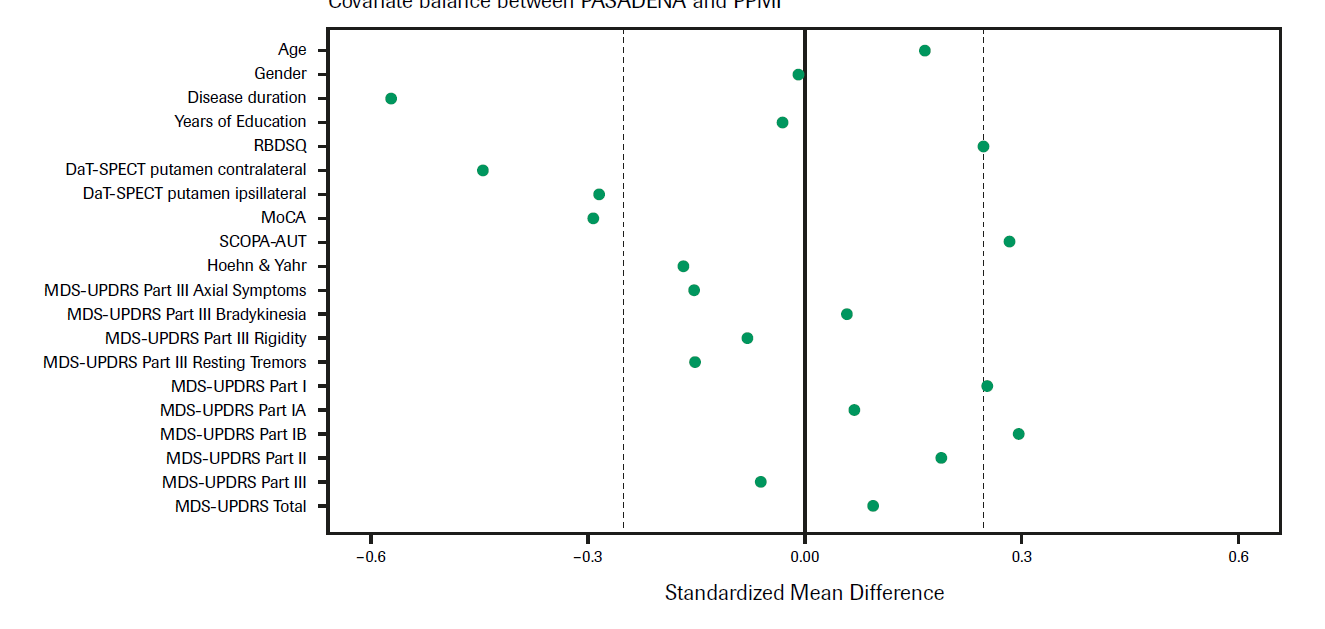


DaT-SPECT, dopamine transporter single-photon emission computerized tomography; MDS-UPDRS, Movement Disorder Society Unified Parkinson’s Disease Rating Scale; MoCA, Montreal Cognitive Assessment; PPMI, Parkinson’s Progression Marker Initiative; RBDSQ, Rapid Eye Movement Sleep Behavior Disorder Screening Questionnaire; SCOPA-AUT, Scales for outcomes in Parkinson’s disease autonomic dysfunction.
